# Supplementary material for: Transparent thin films and monoliths synthesized from fullerene doped mesoporous silica: evidence for embedded monodispersed C60Electronic supplementary information (ESI) available: diffuse reflectance spectra of C60 embedded in mesoporous molecular sieve films. See http://www.rsc.org/suppdata/cc/b2/b208615h/
Source: Royal Society of Chemistry journal article supplement (doi:10.1039/b208615h), 2002-11-28
Supplement: b208615h.doc [file b208615h.doc]

# Supplementary Figure 1

Diffuse Reflectance spectra of C60 embedded in mesoporous molecular sieve (MMS) films. The spectra of the MMS film, C60 in KBr and UV-Vis spectra of C60 in toluene are included for comparison. (a) C60 in toluene, (b) C60 in KBr, (c) MMS in the absence of C60,,(d) C60/SiO2 (mol ratio = 1.5 10-4), (e) C60/SiO2 (mol ratio = 2.010-4), (f) C60/SiO2 (mol ratio = 2.010-4, 20 h contact time).

The peak at ca. 330 nm, for C60 in toluene, is off the scale and is excluded for clarity

The feature at ca. 380 nm, which is present for all spectra, is an instrumental artefact.
